# Supplementary material
Source: PubMed Central journal article supplement (PMC6301150)
Supplement: NIHMS972450-supplement-supplement_1.pdf [file NIHMS972450-supplement-supplement_1.pdf]

**Supplemental Table S1. O<sub>3</sub> concentration distribution by city and summer/winter seasons (summer = June, July, and August; winter = December, January, and February)**

| City/Season       | Ozone (ppb) levels across city/season days |                             |                             |                             |         |      |
|-------------------|--------------------------------------------|-----------------------------|-----------------------------|-----------------------------|---------|------|
|                   | Minimum                                    | 10 <sup>th</sup> percentile | 50 <sup>th</sup> percentile | 90 <sup>th</sup> percentile | Maximum | Mean |
| Atlanta Summer    | 22.2                                       | 40.1                        | 57.0                        | 86.6                        | 96.5    | 56.6 |
| Atlanta Winter    | 9.2                                        | 18.5                        | 25.4                        | 34.7                        | 46.2    | 26.0 |
|                   |                                            |                             |                             |                             |         |      |
| Birmingham Summer | 23.6                                       | 36.2                        | 51.8                        | 67.6                        | 83.5    | 51.7 |
| Birmingham Winter | 9.4                                        | 21.2                        | 27.4                        | 36.2                        | 49.1    | 27.9 |
|                   |                                            |                             |                             |                             |         |      |
| Dallas Summer     | 28.2                                       | 35.8                        | 50.6                        | 68.9                        | 80.2    | 50.6 |
| Dallas Winter     | 9.2                                        | 19.8                        | 29.2                        | 38.2                        | 44.5    | 28.6 |
|                   |                                            |                             |                             |                             |         |      |
| Pittsburgh Summer | 23.6                                       | 42.5                        | 55.6                        | 70.7                        | 106.3   | 55.6 |
| Pittsburgh Winter | 3.9                                        | 13.0                        | 20.0                        | 27.6                        | 35.8    | 20.0 |
|                   |                                            |                             |                             |                             |         |      |
| St. Louis Summer  | 29.4                                       | 41.6                        | 55.7                        | 71.1                        | 89.6    | 55.7 |
| St. Louis Winter  | 6.5                                        | 15.5                        | 22.3                        | 29.3                        | 39.3    | 22.4 |

Supplemental Figure S1. Rate ratios and 95% confidence intervals from cubic spline C-R models for adults (>18 years) and children (≤18 years).<sup>a</sup> Rate ratios use O<sub>3</sub> of 20 ppb as reference.

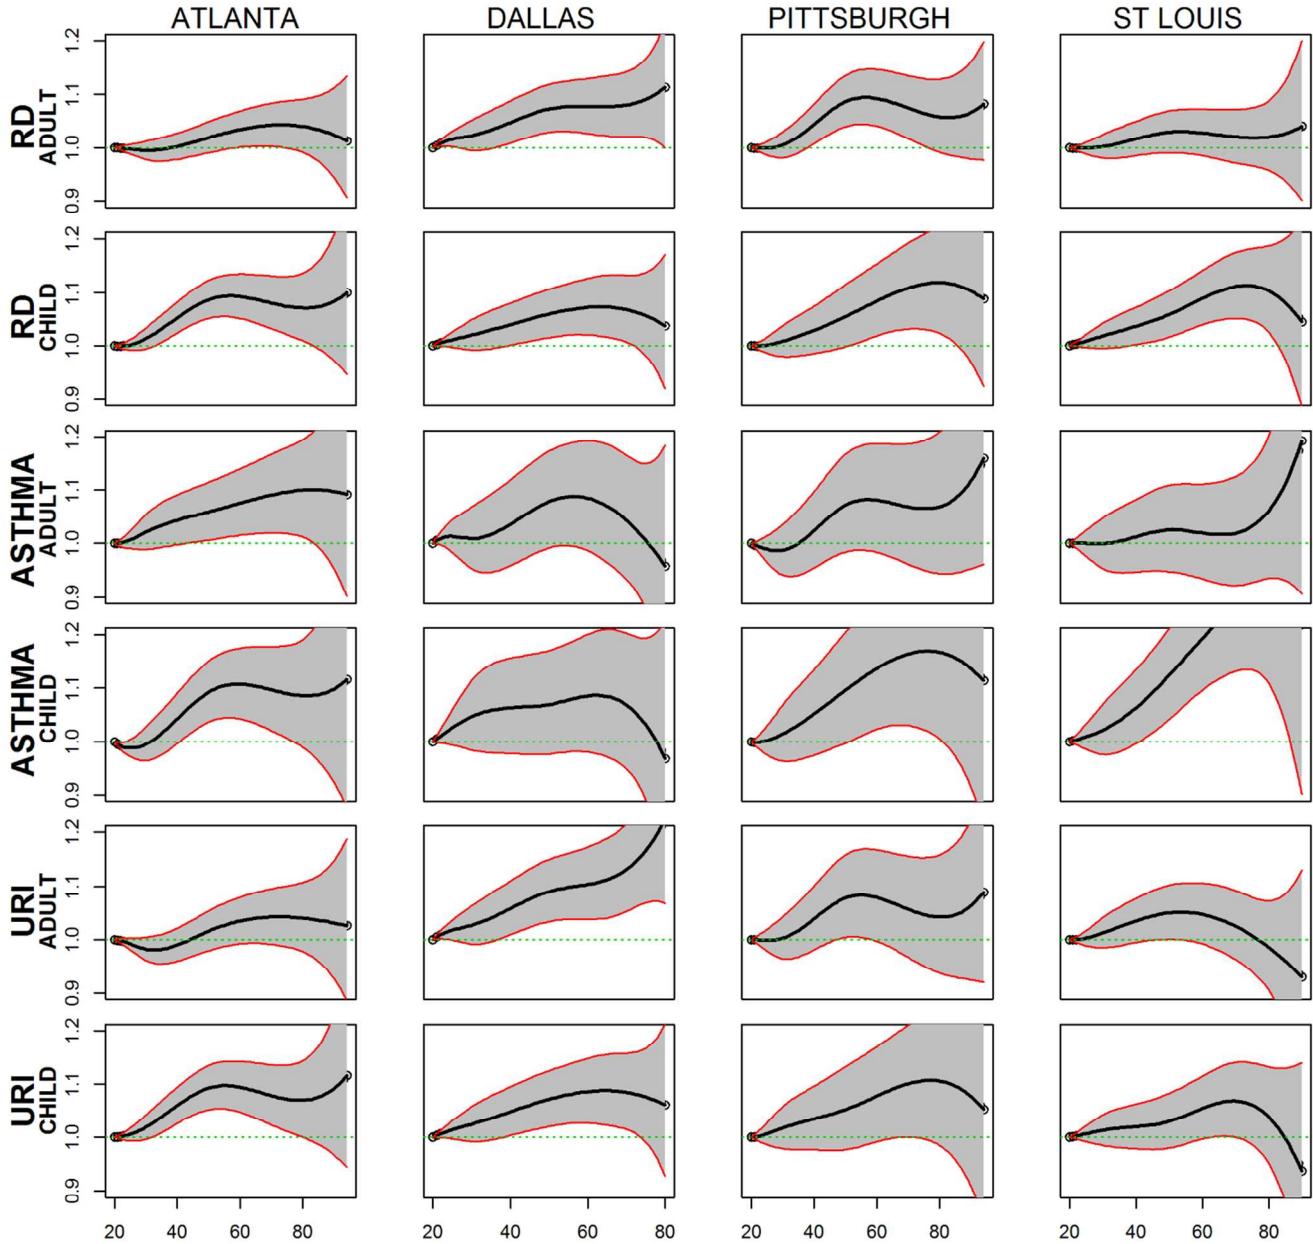

<sup>a</sup>Birmingham not included because no children's hospital data available
